# Supplementary material
Source: Springer Nature journal article supplement (https://www.springerprofessional.de/resource/supplementary/40327_2013_2_MOESM7_ESM.pdf/10801434)

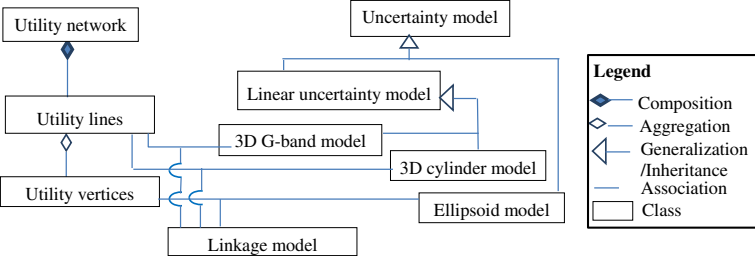

Supplement: MOESM7 [file 10801434]
